# Supplementary material for: Dysregulated Zn2+ homeostasis impairs cardiac type-2 ryanodine receptor and mitsugumin 23 functions, leading to sarcoplasmic reticulum Ca2+ leakage
Source: PubMed Central journal article supplement (PMC5555195; doi:10.1074/jbc.m117.781708), 2017-06-19
Supplement: 10.1074_M117.781708_jbc.M117.781708-1.pdf [file 10.1074_M117.781708_jbc.M117.781708-1.pdf]

Dysregulated Zn<sup>2+</sup> homeostasis impairs cardiac type-2 ryanodine receptor and mitsugumin 23 functions, leading to sarcoplasmic reticulum Ca<sup>2+</sup> leakage

Benedict Reilly-O'Donnell\*<sup>1</sup>, Gavin B. Robertson\*<sup>1</sup>, Angela Karumbi<sup>1</sup>, Connor McIntyre<sup>1</sup>, Wojciech Bal<sup>2</sup>, Miyuki Nishi<sup>3</sup>, Hiroshi Takeshima<sup>3</sup>, Alan J. Stewart<sup>1</sup> & Samantha J. Pitt<sup>1#</sup>

<sup>1</sup>School of Medicine, University of St Andrews, St Andrews, KY16 9TF, UK. <sup>2</sup> Department of Biophysics, Institute of Biochemistry and Biophysics, Polish Academy of Science, Warsaw, 02-106 Poland. <sup>3</sup>Graduate School of Pharmaceutical Sciences, Kyoto University, Kyoto, 606-8501, Japan.

Supplemental Data

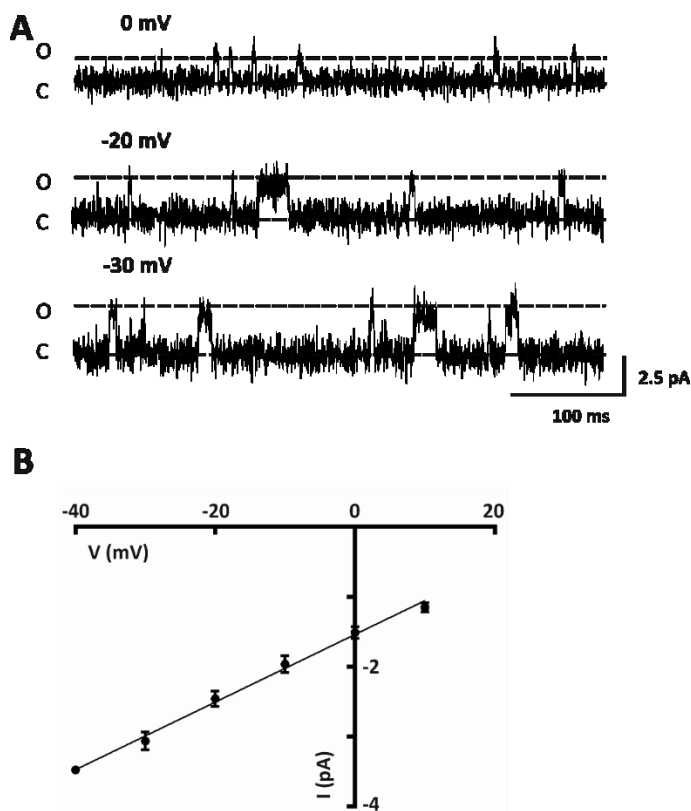

**Figure S1. Single-channel properties of purified MG23.** (A) Purified MG23 single-channel recordings using Ca<sup>2+</sup> as the permeant ion at the indicated holding potential. The traces in this figure are not representative of Po but were chosen to show current amplitudes clearly. O and C show the fully open and closed states, respectively. (B) Current-voltage relationship of MG23 with Ca<sup>2+</sup> as the permeant ion. Values are mean  $\pm$  SD ( $n = 6$ ).

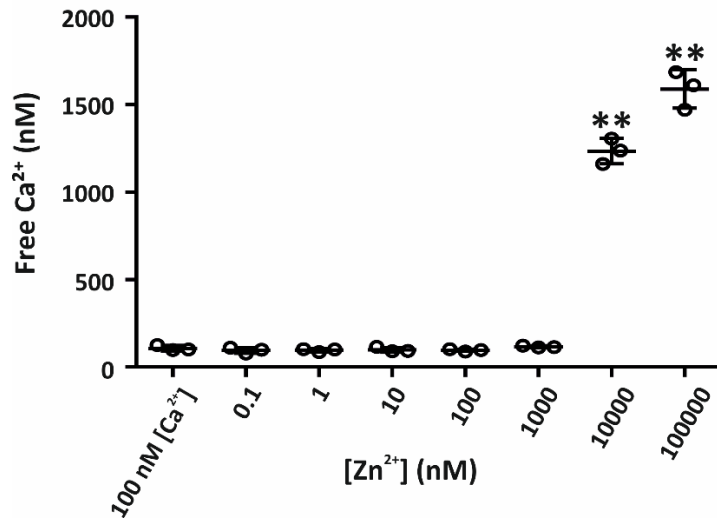

**Figure S2. Effects of Zn<sup>2+</sup> on Ca<sup>2+</sup> levels in BAPTA treated recording solutions.** The free [Ca<sup>2+</sup>] of our TRIS/HEPES solution prior to the addition of BAPTA was determined using a Ca<sup>2+</sup>- selective electrode. In order to lower the [Ca<sup>2+</sup>] of our TRIS/HEPES solution, BAPTA was added until the measured free [Ca<sup>2+</sup>] was 100 nM. Incremental increase of Zn<sup>2+</sup> in the range 100 pM - 100  $\mu$ M was added as ZnCl<sub>2</sub> to the BAPTA-treated solution and shown to have no significant effect until the [Zn<sup>2+</sup>]  $\geq$  10  $\mu$ M. Data are displayed as mean  $\pm$  SD,  $n=3$ . (\*\*) indicates significance ( $p \leq 0.01$ ) when compared to 100 nM [Ca<sup>2+</sup>].

| Calculated free [Zn <sup>2+</sup> ] and [Ca <sup>2+</sup> ] in BAPTA-treated TRIS/HEPES solutions |                                  |                                  |
|---------------------------------------------------------------------------------------------------|----------------------------------|----------------------------------|
| Total [Zn <sup>2+</sup> ]<br>(nM)                                                                 | Free [Zn <sup>2+</sup> ]<br>(nM) | Free [Ca <sup>2+</sup> ]<br>(nM) |
| 0.109                                                                                             | 0.000204                         | 91.3                             |
| 1.009                                                                                             | 0.0019                           | 91.4                             |
| 10                                                                                                | 0.0188                           | 91.6                             |
| 50                                                                                                | 0.0946                           | 92.4                             |
| 100                                                                                               | 0.192                            | 93.5                             |
| 1000                                                                                              | 2.43                             | 118                              |
| 10000                                                                                             | 1290                             | 2600                             |

**Table S1: Calculated free [Zn<sup>2+</sup>] and [Ca<sup>2+</sup>] in BAPTA-treated TRIS/HEPES solutions.** Free Zn<sup>2+</sup> calculations were performed using the MIQUV program. Calculations were performed using the ionic composition of TRIS/HEPES recording solutions at room temperature (22 ± 2 °C).

## References

1. Bogni, L., Sabatini, A., and Vacca, A. (1983) Complex formation equilibria between 2-amino-2(hydroxymethyl)-1,3,-propanediol (tris, tham) and nickel(II), copper(II), zinc(II) and hydrogen ions in aqueous solutions. *Inorg Chimica Acta* **69**, 71-75
